# Supplementary material for: Genetic and Genomic Analyses of Drosophila melanogaster Models of Chromatin Modification Disorders
Source: PubMed Central journal article supplement — bioRxiv. 2023 Apr 1:2023.03.30.534923. Preprint. [Version 1] doi: 10.1101/2023.03.30.534923 (PMC10081333; doi:10.1101/2023.03.30.534923), 2023-04-01

| Fly Gene Symbol | BDRC Line # | GAL4 Driver Line                                                                    |                                                                                      |                                                                                       |
|-----------------|-------------|-------------------------------------------------------------------------------------|--------------------------------------------------------------------------------------|---------------------------------------------------------------------------------------|
|                 |             | Ubiquitin                                                                           | Actin                                                                                | Ubi156                                                                                |
| <i>Bap111</i>   | 35242       |    |    | ✗                                                                                     |
| <i>brm</i>      | 34520       | ✗                                                                                   | ✗                                                                                    | ✗                                                                                     |
| <i>brm</i>      | 35211       |    |    |    |
| <i>Nipped-B</i> | 32406       |    |    |    |
| <i>osa</i>      | 35447       |    |    |    |
| <i>SMC3</i>     | 60017       | ✗                                                                                   |   |   |
| <i>SMC3</i>     | 33431       |  | ✗                                                                                    | ✗                                                                                     |
| <i>SMC1</i>     | 34351       |  |  |  |
| <i>SMC1</i>     | 36598       |  |  |  |
| <i>Snr1</i>     | 32372       |  | ✗                                                                                    |  |
| <i>vtd</i>      | 36786       |  |  |  |

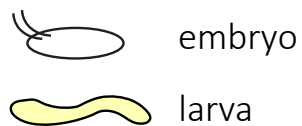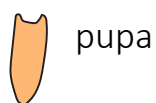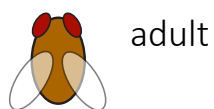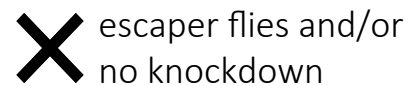

Supplement: media-1.pdf [file media-1.pdf]
