# Supplementary material for: Genetic and Genomic Analyses of Drosophila melanogaster Models of Chromatin Modification Disorders
Source: PubMed Central journal article supplement — bioRxiv. 2023 Apr 1:2023.03.30.534923. Preprint. [Version 1] doi: 10.1101/2023.03.30.534923 (PMC10081333; doi:10.1101/2023.03.30.534923), 2023-04-01

**A**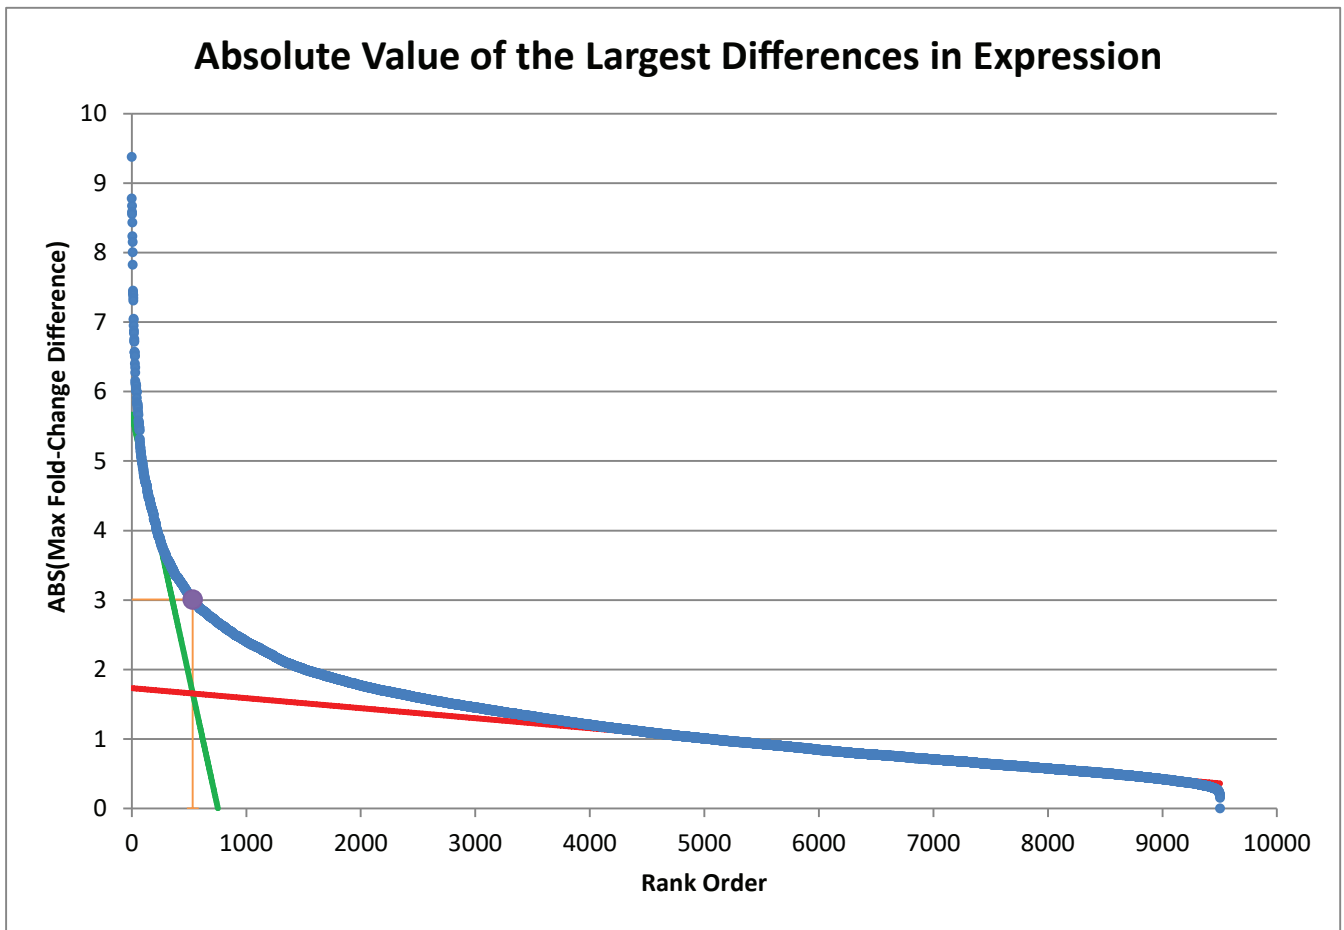**B**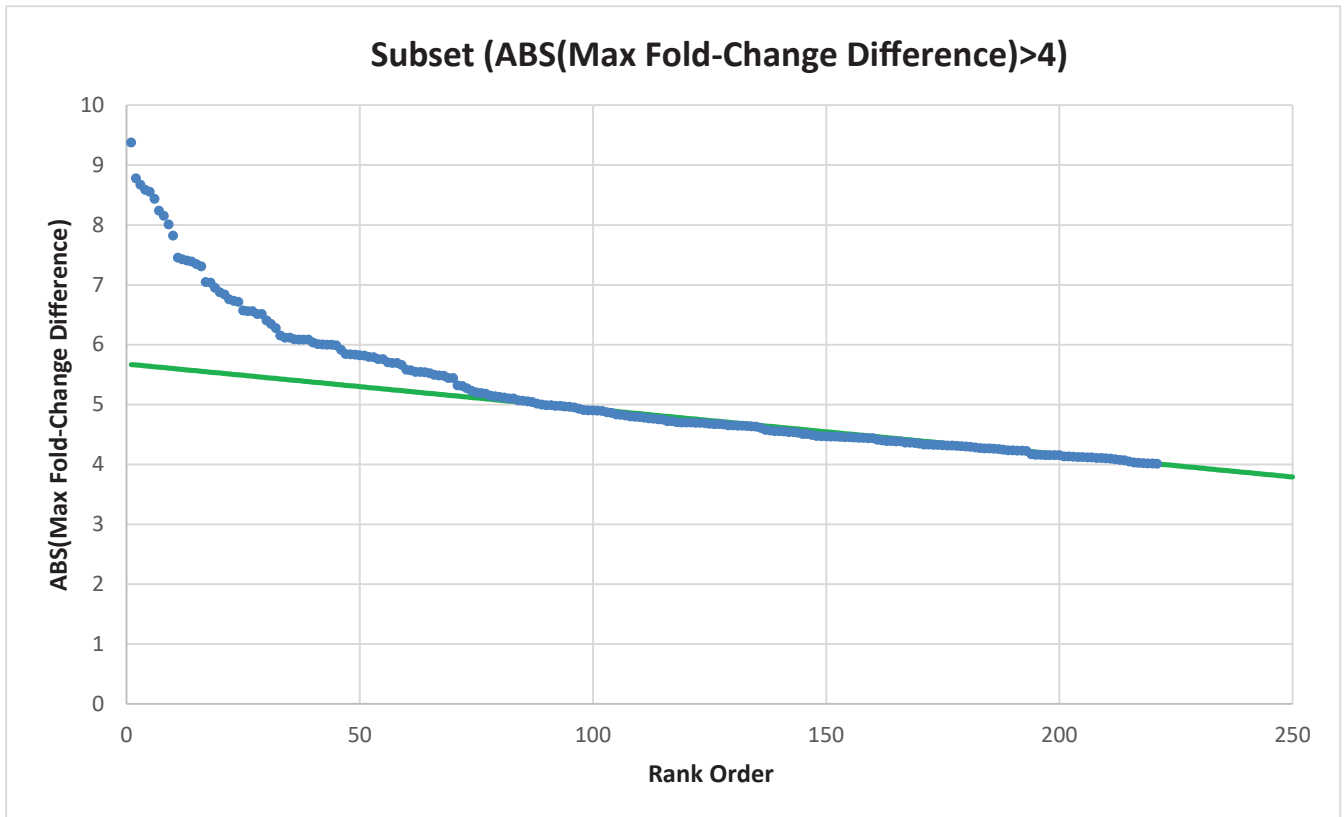

Supplement: media-2.pdf [file media-2.pdf]
